# Supplementary material for: Bovine tuberculosis breakdown duration in cattle herds: an investigation of herd, host, pathogen and wildlife risk factors
Source: PubMed Central journal article supplement (PMC7003687; doi:10.7717/peerj.8319), 2020-02-03

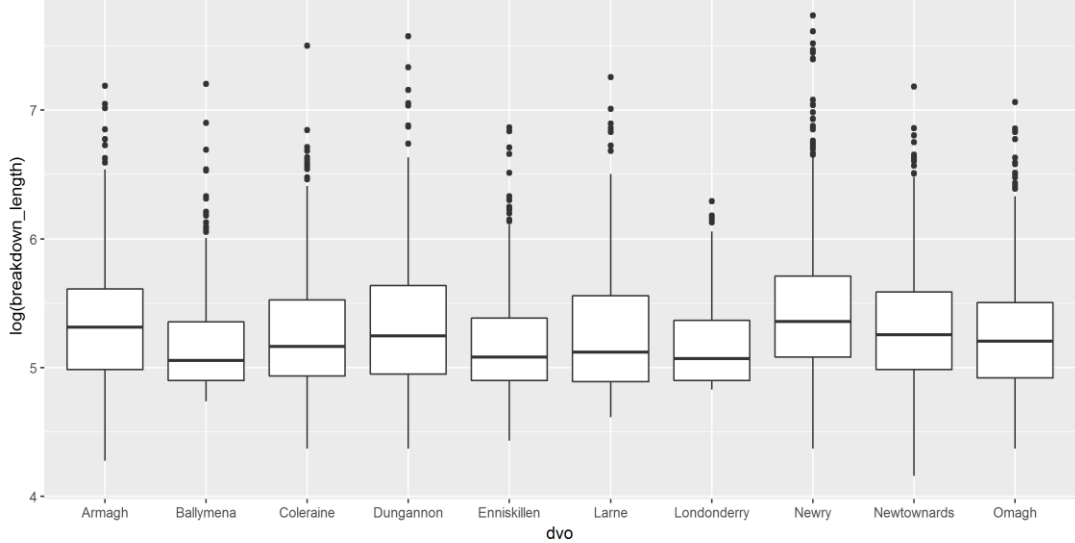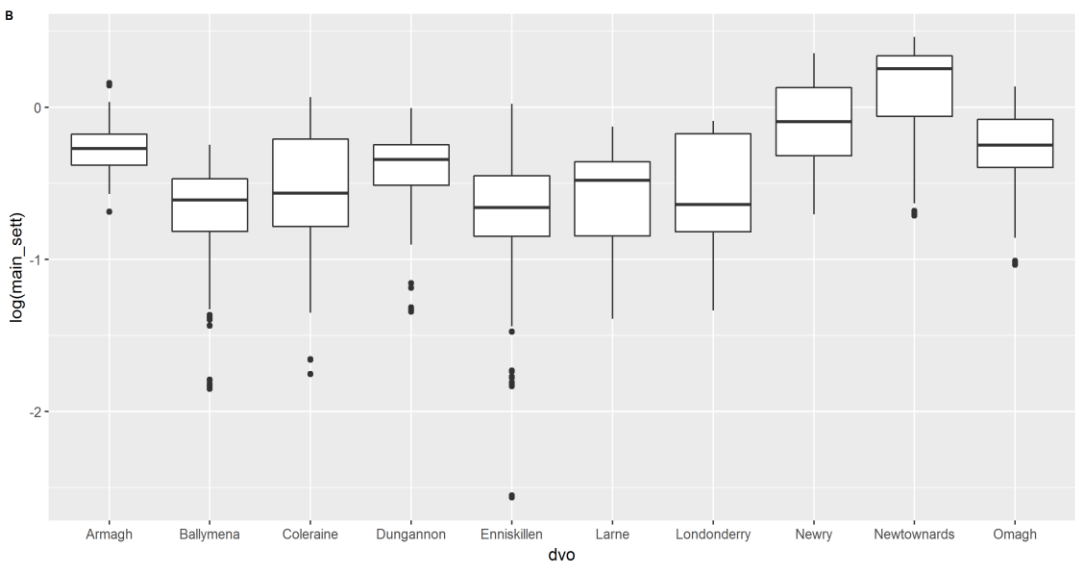

Supplement: peerj-08-8319-s001.pdf [file peerj-08-8319-s001.pdf]
